# Supplementary material
Source: Springer Nature journal article supplement (https://www.springermedizin.de/resource/supplementary/12885_2010_2820_MOESM3_ESM.pdf/9462016)

**Decorin**

**Versican**

**Breast carcinoma with MD**

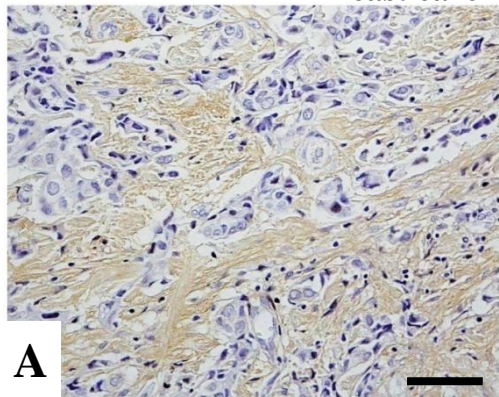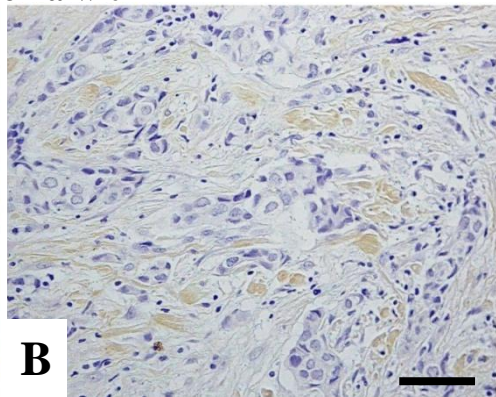

**Breast carcinoma with MAMCs**

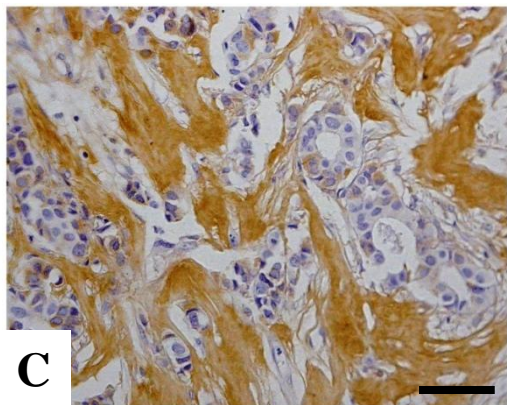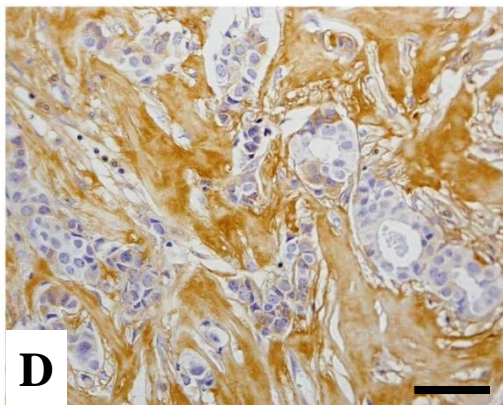

**Normal breast with MAMCs**

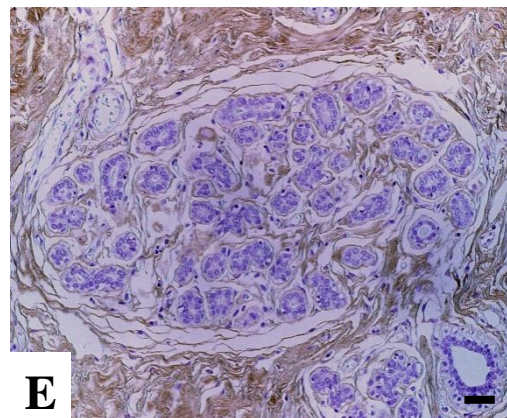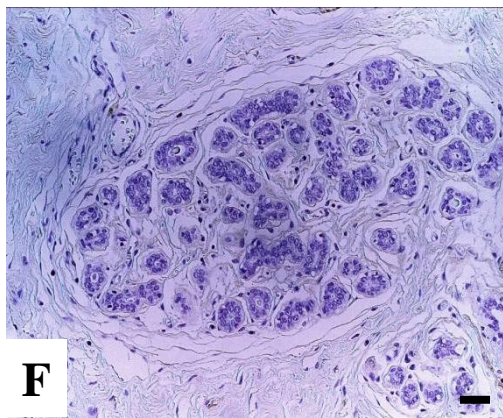

Supplement: MOESM3 [file 9462016]
